# Supplementary material for: Ecogenomics reveals viral communities across the Challenger Deep oceanic trench
Source: PubMed Central journal article supplement (PMC9529941; doi:10.1038/s42003-022-04027-y), 2022-10-04
Supplement: 42003_2022_4027_MOESM2_ESM.pdf [file 42003_2022_4027_MOESM2_ESM.pdf]

933 **Supplementary Information**

934

935 **Ecogenomics reveals viral communities across the Challenger Deep oceanic trench**

936

937

938 Ying-Li Zhou<sup>1,2, #</sup>, Paraskevi Mara<sup>3, #</sup>, Dean Vik<sup>4</sup>, Virginia P. Edgcomb<sup>3</sup>, Matthew B.  
939 Sullivan<sup>4,5</sup>, Yong Wang<sup>1,6, \*</sup>

940 <sup>1</sup> Institute of Deep-Sea Science and Engineering, Chinese Academy of Sciences, Sanya,  
941 Hainan, China

942 <sup>2</sup> University of the Chinese Academy of Sciences, Beijing, China

943 <sup>3</sup> Department of Geology and Geophysics, Woods Hole Oceanographic Institution,  
944 Woods Hole, MA, USA

945 <sup>4</sup> Department of Microbiology and Center of Microbiome Science, The Ohio State  
946 University, Columbus, OH, USA

947 <sup>5</sup> Department of Civil, Environmental and Geodetic Engineering, The Ohio State  
948 University, Columbus, OH, USA

949 <sup>6</sup> Institute for Ocean Engineering, Shenzhen International Graduate School, Tsinghua  
950 University, Shenzhen, China

951 # These authors contributed equally

952 \* Yong Wang

953 **Email:** wangyong@sz.tsinghua.edu.cn

954

955 **Supplementary Information includes:**

956 Supplementary Figures 1-10.

957 Supplementary Tables 1 and 2.

958 Legends for Supplementary Data 1-11. Supplementary Data 1-11 are provided in separate  
959 excel files.

960

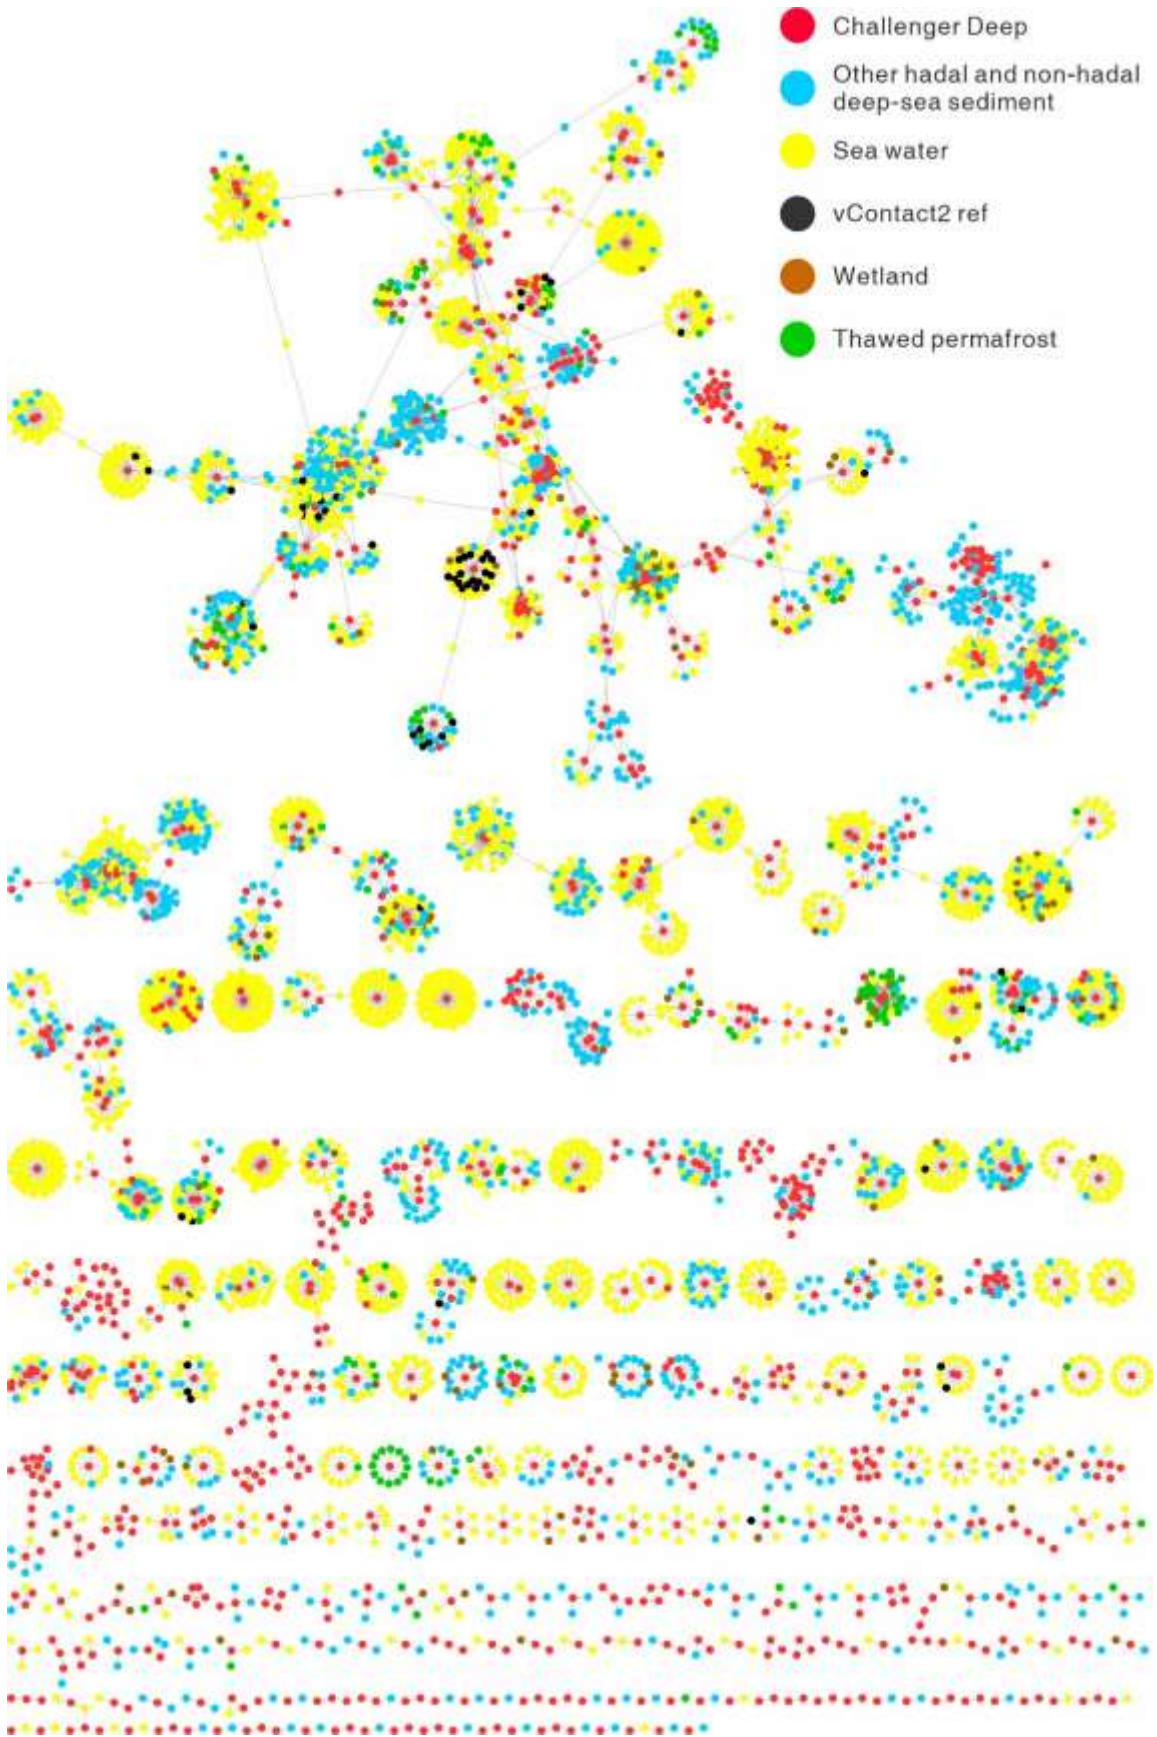

962 **Supplementary Fig. 1.** Protein-sharing network between viral contigs from Challenger  
963 Deep (n = 1 628), other hadal and non-hadal deep-sea (n = 2 885) and wetland sediments  
964 (n = 1 212), Global Ocean Virome 2.0 (n = 195 728), thawed permafrost soils (n=1 907),  
965 and vContact2 RefSeq prokaryotic viral genomes (n = 2 010). Nodes (circles) represent  
966 viral contigs. Shared edges (lines) indicate shared protein content. Well-supported viral  
967 clusters containing CD vOTUs were shown in this figure.

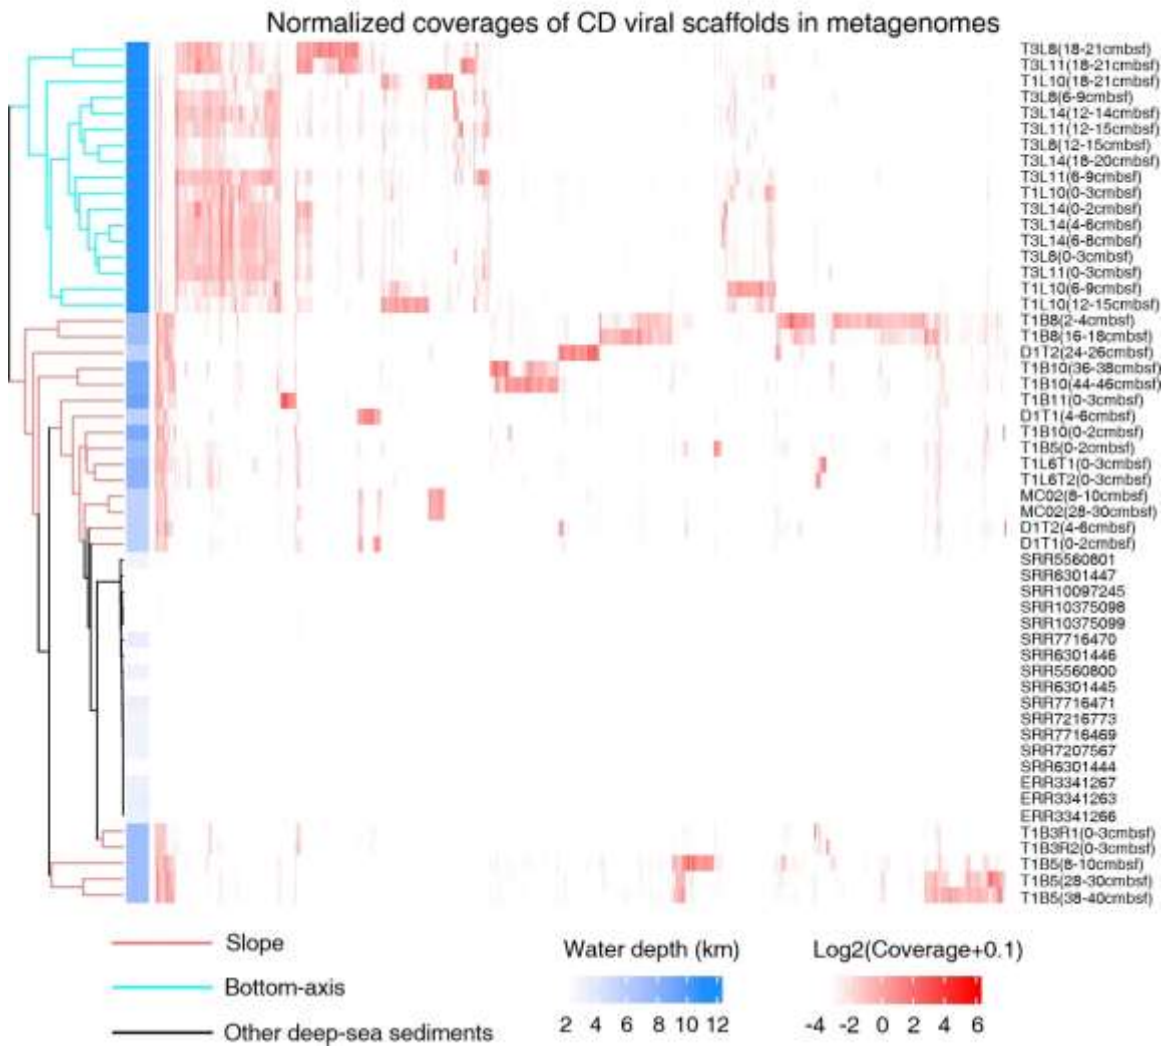

968

969 **Supplementary Fig. 2.** Normalized coverages of viral populations (species level) in CD  
 970 and reference deep-sea metagenomes. Each row represents an individual CD metagenome,  
 971 while each column represents an individual CD viral population. The normalized relative  
 972 abundance values (log<sub>2</sub>-transformed) are shown in color scale. Red, blue and black lines  
 973 represent the hierarchical clustering of slope, bottom-axis and other deep-sea sediments,  
 974 respectively.

975

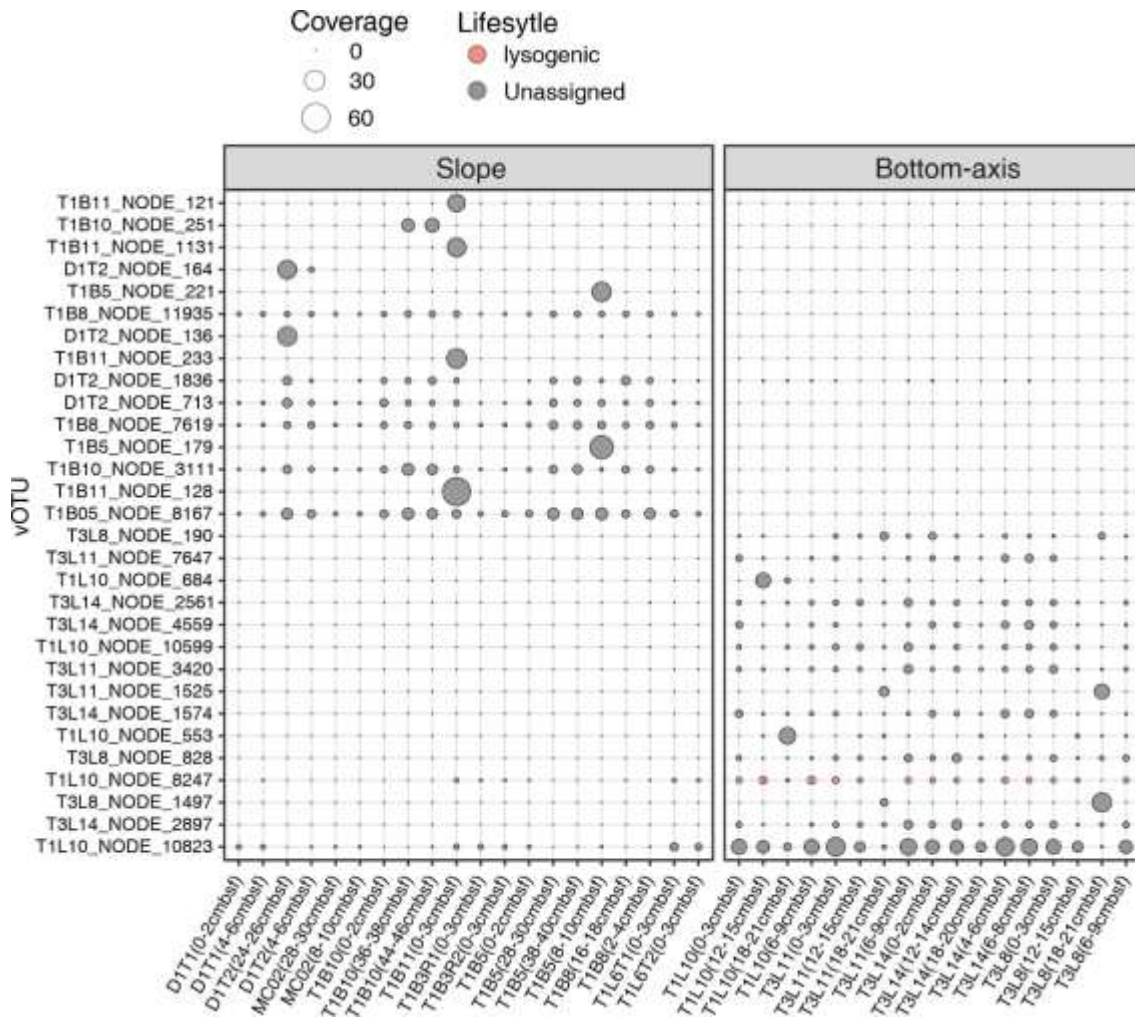

976

977 **Supplementary Fig. 3.** Relative abundance of the 15 most abundant viral populations for  
 978 slope and bottom-axis samples. The bubbles indicate the normalized coverage (coverage  
 979 per giga base), and the predicted lifestyle of viruses for each sample.

980

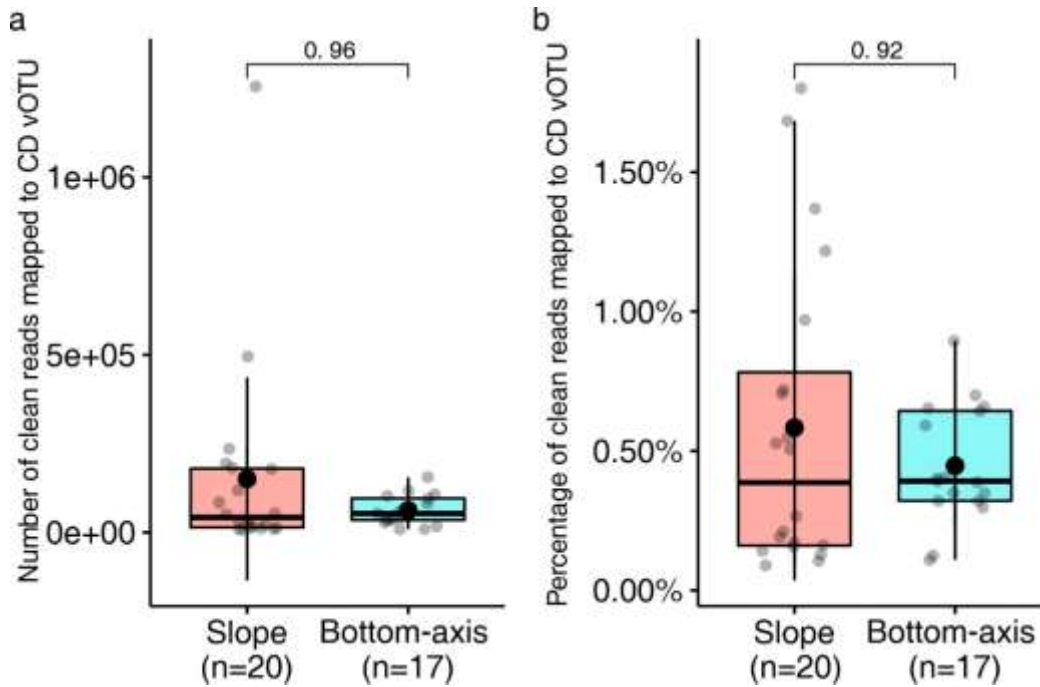

981

982 **Supplementary Fig. 4.** Sequencing depth of CD viromes in number of total paired reads  
 983 per metagenome. (a) The number of paired-end reads mapped to CD vOTUs. (b)  
 984 Percentage of paired-end reads mapped to CD vOTUs in metagenomes. *p*-value was  
 985 estimated using the two-sided Wilcoxon test. For boxplots, centre line indicates median,  
 986 bounds of box indicate 25th and 75th percentiles, and whiskers indicate minimum and  
 987 maximum.

988

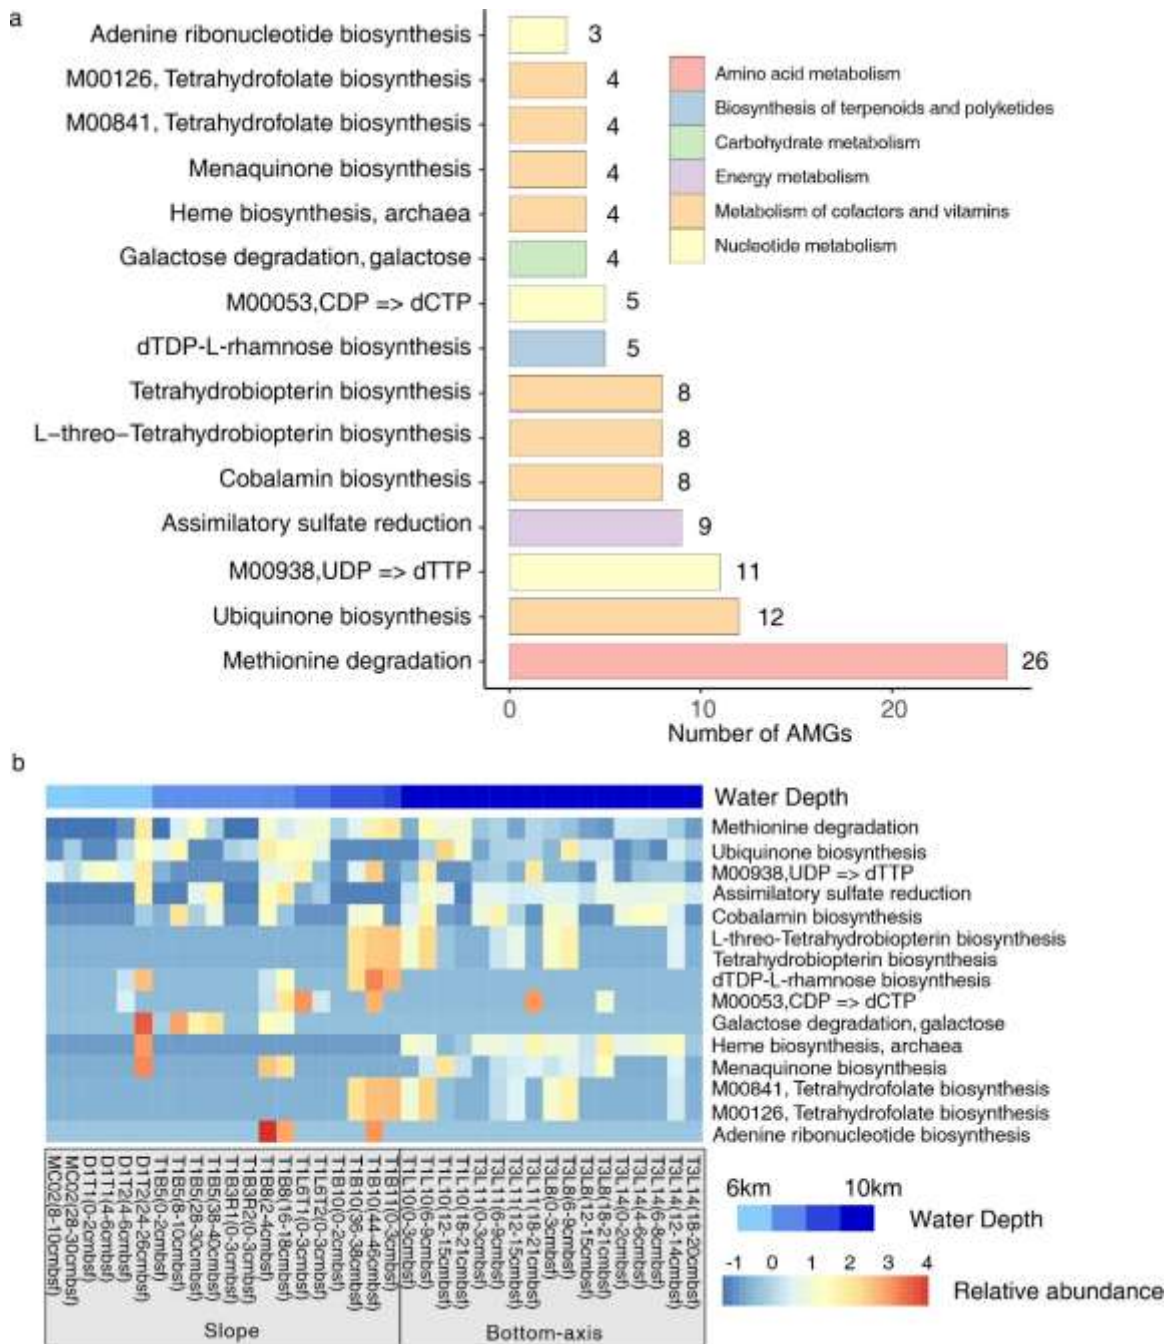

989

990 **Supplementary Fig. 5** Overview of putative AMGs in CD viral communities. (a) Number  
 991 of putative AMGs involved ranked by AMGs prevalence in CD virome (top fifteen shown).  
 992 (b) Abundance of viruses that have genes belonging to the fifteen most prevalent AMGs  
 993 identified in CD sediment viromes. The genes identified in various KEGG-described  
 994 metabolisms are listed in Supplementary Data 9. Relative abundances were log<sub>2</sub>  
 995 transformed and normalized with a z-score method based on normalized vOTUs coverage.

996

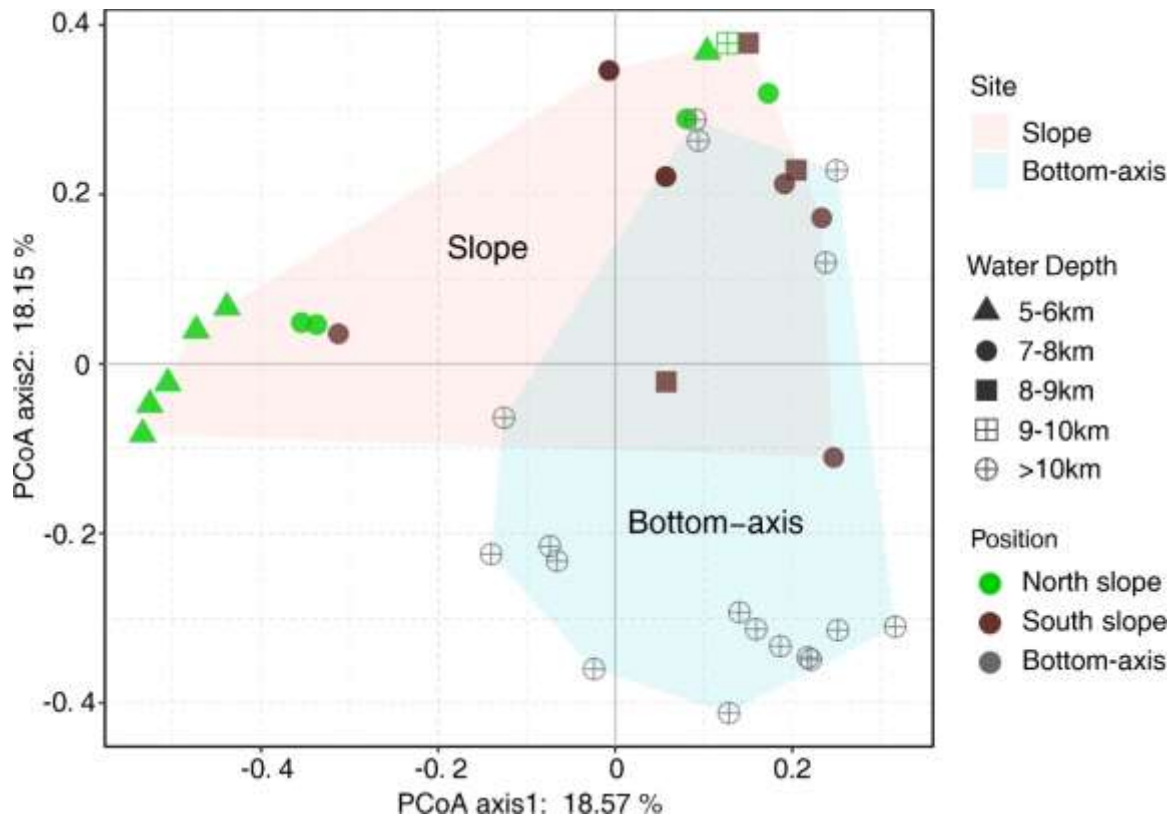

997

998 **Supplementary Fig. 6.** Bray-Curtis dissimilarity principal coordinate analyses (PCoA) of  
 999 the viral AMGs. The pink and blue areas covered slope and bottom-axis samples,  
 1000 respectively.

1001



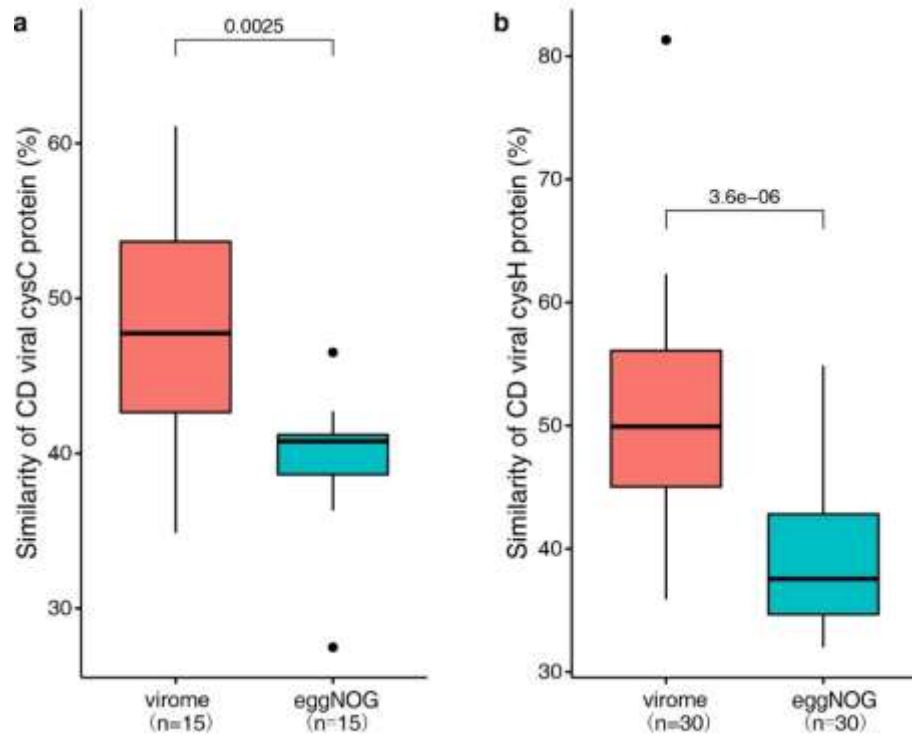

1002

1003 **Supplementary Fig. 7.** Similarity of each Cys protein (CysC/CysH) with the five closest  
 1004 homologues recruited from public viromes and the eggNOG database, respectively. Three  
 1005 CysC (**a**) and six CysH proteins (**b**) from CD viral contigs. Boxplots represent the median  
 1006 with 25th and 75th percentiles, and whiskers show the 1.5 interquartile range.

1007

1008

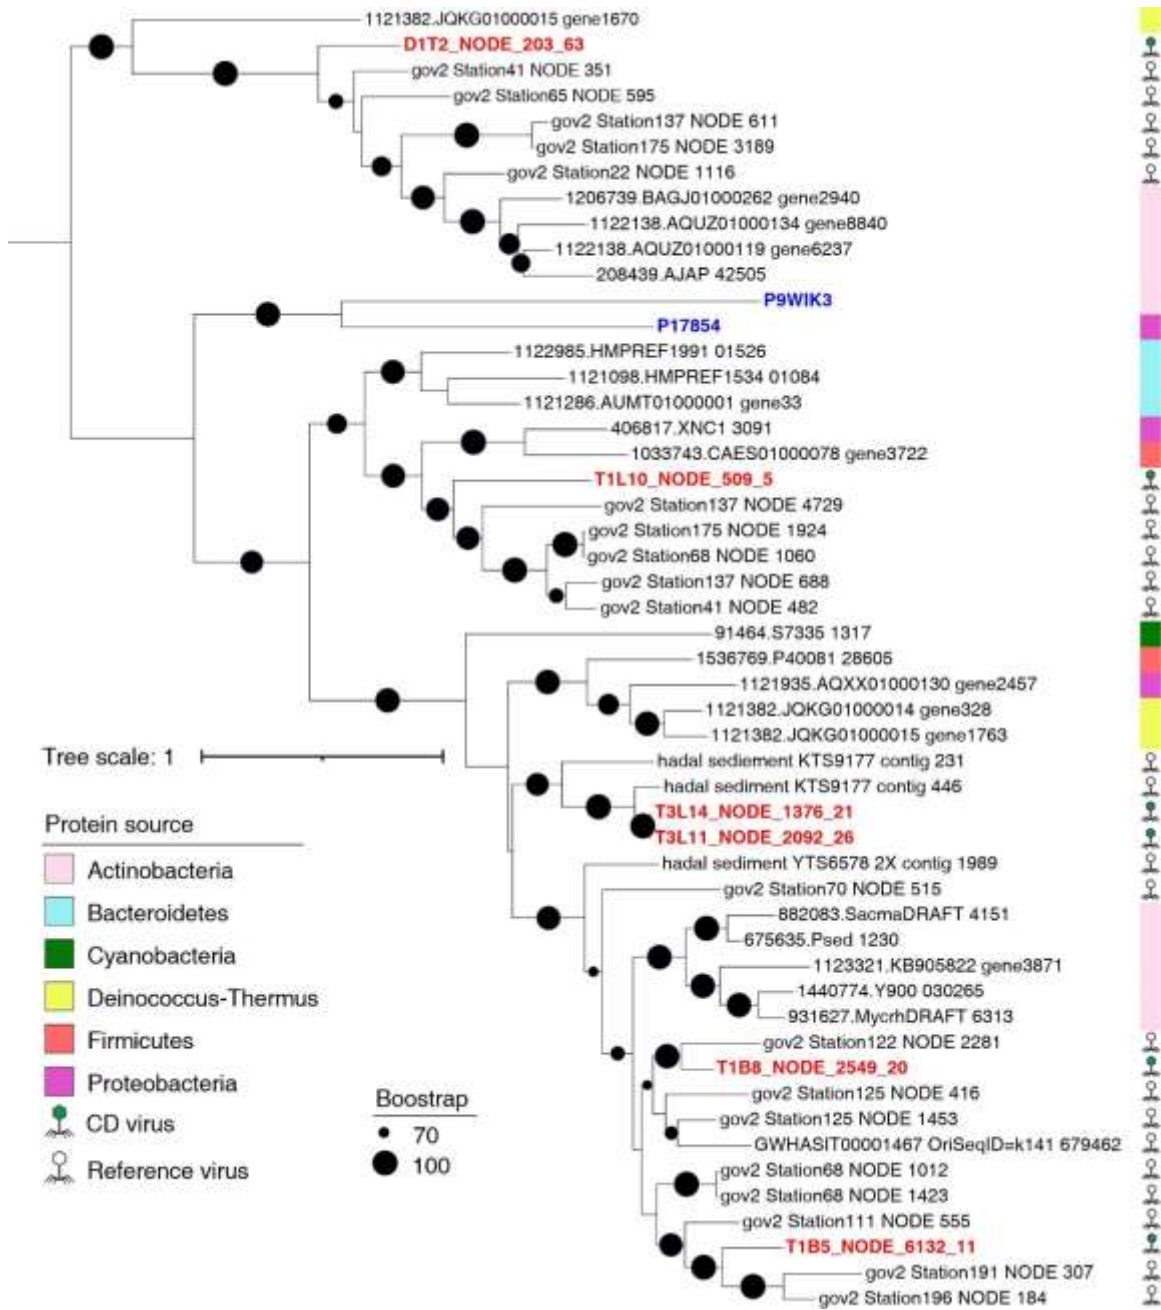

1010  
 1011 **Supplementary Fig. 8.** Maximum-likelihood phylogenetic tree between the identified CD  
 1012 CysH proteins (this study) and the CysH proteins found in eggNOG database (V5.0). The  
 1013 tree is rooted in the mid-point. Two CysH homologs from Uniport database are in blue,  
 1014 and indicate protein function based on experimental evidence. Bootstrap values (1 000  
 1015 replicates)  $\geq 70\%$  are indicated at nodes.  
 1016

1017

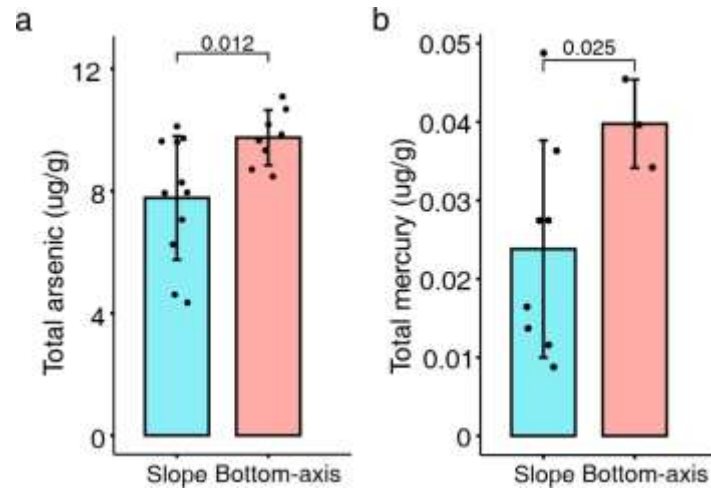

1018

1019 **Supplementary Fig. 9.** Total arsenic and mercury concentrations ( $\mu\text{g g}^{-1}$  of dry sediment)  
1020 in 13 CD sites (5 400-10 911 m depth).  $p$  values were estimated using two-sided Wilcoxon  
1021 test for pairwise comparisons. CD sediments were analyzed for total arsenic and mercury  
1022 using Atomic Fluorescence Spectrometry. Bar graphs identify mean and standard error bars.

1023

1024

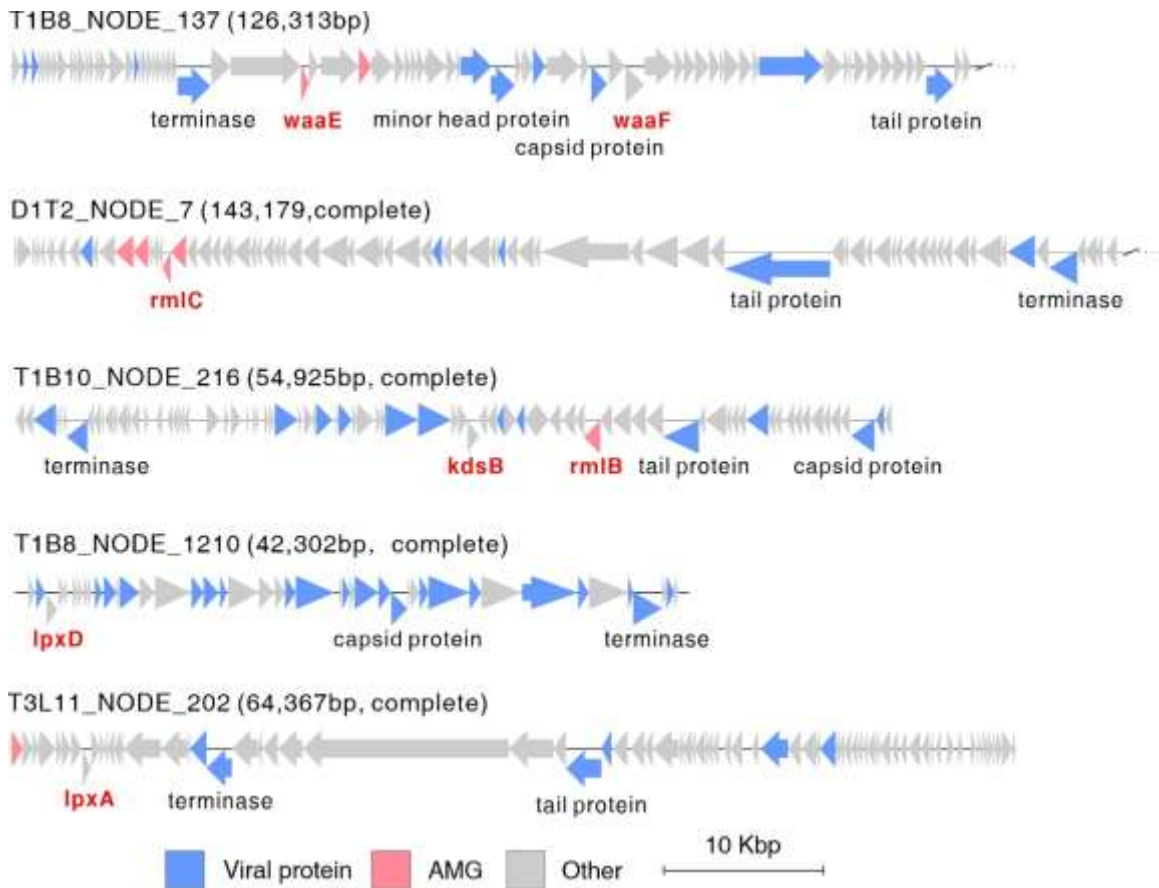

1025

1026 **Supplementary Fig. 10.** Genome maps of the viral contigs that contain LPS and dTDP-  
1027 L-rhamnose synthetic genes. The maps indicate the positions of these genes in the  
1028 viromes, and the upstream and/or downstream phage genes. Viral genes were annotated  
1029 by CheckV and VIBRANT. AMGs, non-phage-like and uncharacterized genes are shown  
1030 in blue, pink and gray, respectively. Detailed functional annotation of the viral scaffolds  
1031 can be found in Supplementary Data 8.

1032 **Supplementary Table 1.** Sampling sites and sampling methods used for collecting the sediment samples in CD

| Cruise | Sample station    | Sampling method               | Latitude [North] | Longitude [East] | Water Depth [m] | Position in trench | Layers for metagenome [cmbsf] | Layers for metatranscriptome [cmbsf] |
|--------|-------------------|-------------------------------|------------------|------------------|-----------------|--------------------|-------------------------------|--------------------------------------|
| DY37II | MC02              | push core (submersible)       | 11.764           | 141.976          | 5 400           | slope              | 8-10; 28-30                   | \                                    |
| DY37II | D1T1 <sup>#</sup> | push core (submersible)       | 11.801           | 142.117          | 5 533           | slope              | 0-2; 4-6                      | \                                    |
| DY37II | D1T2 <sup>#</sup> | push core (submersible)       | 11.801           | 142.117          | 5 533           | slope              | 4-6; 24-26                    | \                                    |
| TS01   | T1B5              | box core (hydrographic cable) | 10.924           | 141.799          | 7 061           | slope              | 0-2; 8-10; 28-30; 38-40       | \                                    |
| TS01   | T1B3              | box core (hydrographic cable) | 11.553           | 141.873          | 7 082           | slope              | 0-3                           | \                                    |
| TS01   | T1B8              | box core (hydrographic cable) | 11.602           | 142.228          | 7 143           | slope              | 2-4; 16-18                    | \                                    |
| TS01   | T1L6              | push core (lander)            | 11.091           | 142.073          | 7 850           | slope              | 0-2 (two push cores)          | \                                    |
| TS01   | T1B10             | box core (hydrographic cable) | 11.195           | 141.812          | 8 638           | slope              | 0-2; 36-38; 44-46             | \                                    |
| TS01   | T1B11             | box core (hydrographic cable) | 11.228           | 141.689          | 9 150           | slope              | 0-3                           | \                                    |
| TS03   | T3L11             | push core (lander)            | 11.325           | 142.191          | 10 908          | bottom-axis        | 0-3; 6-9; 12-15; 18-21        | 6-9; 12-15; 18-21                    |
| TS03   | T3L8              | push core (lander)            | 11.327           | 142.194          | 10 909          | bottom-axis        | 0-3; 6-9; 12-15; 18-21        | \                                    |
| TS03   | T3L14             | push core (lander)            | 11.325           | 142.189          | 10 911          | bottom-axis        | 0-2; 4-6; 6-8; 12-14; 18-20   | \                                    |
| TS01   | T1L10             | push core (lander)            | 11.328           | 142.202          | 10 900          | bottom-axis        | 0-3; 6-9; 12-15; 18-21        | \                                    |

1033 <sup>#</sup>: sediment samples from two slope sites (~ 100m apart) collected in a single dive of the submersible “Jiaolong”.

1034

1035 **Supplementary Table 2. List of marine viruses related datasets**

| Environment source                    | Ocean virome dataset                            | Ocean and sea regions (number of samples)                                                                                                                                                                             | Total number of viromes                | Sequencing technology                                             | Data size (Gb) | Reference     |
|---------------------------------------|-------------------------------------------------|-----------------------------------------------------------------------------------------------------------------------------------------------------------------------------------------------------------------------|----------------------------------------|-------------------------------------------------------------------|----------------|---------------|
| Ocean water                           | The Marine Viromes of Four Oceanic Regions      | Arctic Ocean (56; Canadian Arctic and Chukchi Sea), North Atlantic Ocean (42; Sargasso Sea (1), Gulf of Mexico (41)), North Pacific Ocean (85; British Columbia coastal waters)                                       | 4 viromes from 183 integrative samples | Life Sciences 454 pyrosequencing                                  | 0.181          | <sup>1</sup>  |
|                                       | Temperate and subtropical seawater              | Saanich Inlet (11), Strait of Georgia (85), Gulf of Mexico (46)                                                                                                                                                       | 142                                    | Roche 454 Titanium                                                | 1.9 *          | <sup>2</sup>  |
|                                       | Tara Oceans Viromes (TOV)                       | Mediterranean Sea (7), Red Sea (5), Indian Ocean (16), North Atlantic Ocean (0), South Atlantic Ocean (12), Southern Ocean (1), North Pacific Ocean (2), South Pacific Ocean (0)                                      | 43                                     | Illumina HiSeq 2000                                               | 218 *          | <sup>3</sup>  |
|                                       | Global Ocean Viromes (GOV)                      | Mediterranean Sea (8), Red Sea (6), Indian Ocean (27), North Atlantic Ocean (4), South Atlantic Ocean (19), Southern Ocean (4), North Pacific Ocean (15), South Pacific Ocean (21)                                    | 104                                    | Illumina HiSeq 2000                                               | 925            | <sup>4</sup>  |
|                                       | Baltic Sea Viromes                              | Baltic Sea (11)                                                                                                                                                                                                       | 21                                     | Roche 454 pyrosequencing                                          | NA             | <sup>5</sup>  |
|                                       | Global Ocean Viromes 2.0 (GOV 2.0) <sup>#</sup> | Arctic Ocean (38), North Atlantic Drift Province (3; station 155), all GOV samples (104)                                                                                                                              | 145                                    | Illumina HiSeq 2000                                               | 3950           | <sup>6</sup>  |
| Hadal and non-hadal deep-sea sediment | Hadal sediment viromes                          | Izu-Ogasawara Trench (1), Mariana Trench (1)                                                                                                                                                                          | 2                                      | 454 GS FLX Titanium                                               | 0.029          | <sup>7</sup>  |
|                                       | Arctic Ocean metagenome                         | Arctic Ocean: Southern Knipovich Ridge (3) Gakkel Ridge, Loki's castle (1)                                                                                                                                            | 4                                      | Illumina HiSeq 2500                                               | 244            | <sup>8</sup>  |
|                                       | Southwest Indian Ocean bulk metagenome          | Southwest Indian Ocean (6)                                                                                                                                                                                            | 6                                      | Illumina HiSeq-2500                                               | 373            | <sup>9</sup>  |
|                                       | Cold seep bulk metagenome <sup>#</sup>          | Haakon Mosby mud volcano (6); Eastern North Pacific ODP site 1244 (7); Mediterranean Sea-Amon mud volcano (1); Santa Monica Mounds (1); Eastern Gulf of Mexico (3); Scotian Basin (8); and Western Gulf of Mexico (7) | 40                                     | Illumina (MiSeq, NextSeq 500, HiSeq 1500, HiSeq 2500, HiSeq 1000) | 411            | <sup>10</sup> |

|  |                                             |                                                                            |                                         |                                      |     |               |
|--|---------------------------------------------|----------------------------------------------------------------------------|-----------------------------------------|--------------------------------------|-----|---------------|
|  | Hadal sediment bulk metagenome <sup>#</sup> | Marina Trench (2), Kermadec Trench (2), Yap Trench (3)                     | 7                                       | Illumina HiSeq 2500, HiSeq X Ten     | 250 | <sup>11</sup> |
|  | Challenger Deep bulk metagenome             | Slope (20) and bottom-axis (17) sites of Challenger Deep in Mariana Trench | 37 metagenomes and 3 metatranscriptomes | Illumina MiSeq, Illumina HiSeq 2500, | 283 | This study    |

1036 \* Estimated by multiplying the number of reads by the average read length

1037 # Shows datasets used for comparisons in this study

1038

1039 **Supplementary references**

- 1040 1. Angly FE, *et al.* The marine viromes of four oceanic regions. *PLOS Biol* **4**, 2121-2131  
1041 (2006).
- 1042 2. Labonté JM, Suttle CA. Previously unknown and highly divergent ssDNA viruses  
1043 populate the oceans. *ISME J* **7**, 2169-2177 (2013).
- 1044 3. Brum JR, *et al.* Patterns and ecological drivers of ocean viral communities. *Science*  
1045 **348**, 1261498 (2015).
- 1046 4. Roux S, *et al.* Ecogenomics and potential biogeochemical impacts of globally  
1047 abundant ocean viruses. *Nature* **537**, 689-693 (2016).
- 1048 5. Allen LZ, *et al.* The Baltic sea virome: diversity and transcriptional activity of DNA  
1049 and RNA viruses. *mSystems* **2**, e00125-00116 (2017).
- 1050 6. Gregory AC, *et al.* Marine DNA viral macro- and microdiversity from pole to pole.  
1051 *Cell* **177**, 1109–1123 (2019).
- 1052 7. Yoshida M, Takaki Y, Eitoku M, Nunoura T, Takai K. Metagenomic analysis of viral  
1053 communities in (hado)pelagic sediments. *PLoS One* **8**, e57271 (2013).
- 1054 8. Bäckström D, *et al.* Virus genomes from deep sea sediments expand the ocean  
1055 megavirome and support independent origins of viral gigantism. *mBio* **10**, e02497-  
1056 02418 (2019).
- 1057 9. Zheng X, *et al.* Extraordinary diversity of viruses in deep-sea sediments as revealed by  
1058 metagenomics without prior virion separation. *Environ Microbiol* **23**, 728-743 (2021).
- 1059 10. Li Z, *et al.* Deep sea sediments associated with cold seeps are a subsurface  
1060 reservoir of viral diversity. *ISME J* **15**, 2366–2378 (2021).
- 1061 11. Jian H, *et al.* Diversity and distribution of viruses inhabiting the deepest ocean on  
1062 Earth. *ISME J* **15**, 3094–3110 (2021).
- 1063  
1064  
1065  
1066  
1067  
1068  
1069  
1070  
1071  
1072  
1073  
1074  
1075
