# Supplementary material for: Ecogenomics reveals viral communities across the Challenger Deep oceanic trench
Source: PubMed Central journal article supplement (PMC9529941; doi:10.1038/s42003-022-04027-y), 2022-10-04
Supplement: 42003_2022_4027_MOESM3_ESM.pdf [file 42003_2022_4027_MOESM3_ESM.pdf]

## Description of Additional Supplementary Files

**File Name:** Supplementary Data 1

**Description:** Overview of the metagenomes and metatranscriptomes generated from the slope and bottom-axis CD sediments.

**File Name:** Supplementary Data 2

**Description:** Overview of the criteria for What the Phage to identify viral contigs by the raw output results of each tool.

**File Name:** Supplementary Data 3

**Description:** Quality and taxonomy of CD viral scaffolds.

**File Name:** Supplementary Data 4

**Description:** Different percentages of genes mapped in each virus using metatranscriptome reads to determine potentially activate viruses.

**File Name:** Supplementary Data 5

**Description:** Relative abundance of CD vOTUs (species level) in metagenomes and CD vOTUs mapped reads in metatranscriptomes.

**File Name:** Supplementary Data 6

**Description:** Relative abundance of CD viruses at family level.

**File Name:** Supplementary Data 7

**Description:** Predicted prokaryotic hosts of CD vOTUs. Sheet1: Identifications of hosts, Sheet2: Relative abundance of hosts of CD vOTUs

**File Name:** Supplementary Data 8

**Description:** Gene annotations of in CD vOTUs using CheckV, eggNOG, VIBRANT and DRAM-v. Sheet1: Functional annotations of 1 628 CD vOTUs, Sheet2: manually curated vOTUs for analysis of functional metabolic genes (AMGs; see also main text). Sheet3: CD vOTUs removed from AMGs analysis.

**File Name:** Supplementary Data 9

**Description:** Summary of putative auxiliary metabolic genes (AMGs) detected in CD vOTUs using KEGG.

**File Name:** Supplementary Data 10

**Description:** Closest homologs of CD AMGs in the eggNOG database and other viromes (viromes from marine water and deep-sea sediments). Sheet1: Homologs in the eggNOG database. Sheet2: Homologs in other viromes.

**File Name:** Supplementary Data 11

**Description:** Source data for figures.
